# Supplementary material for: Microwave absorbing characteristics of porphyrin derivates: a loop of conjugated structure
Source: Royal Society of Chemistry journal article supplement (doi:10.1039/d3ra03927g), 2023-01-01
Supplement: d3ra03927g1.pdf [file d3ra03927g1.pdf]

# Supporting Information

## Microwave absorbing characteristics of porphyrin derivatives: A loop of conjugated structure

Haniyeh Dogari <sup>a</sup>, Reza Peymanfar <sup>\*b, c, d</sup>, Hossein

Ghafuri <sup>\*a</sup>

*<sup>a</sup> Catalysts and Organic Synthesis Research Laboratory, Department of Chemistry,  
Iran University of Science and Technology, 16846-13114 Tehran, Iran*

*<sup>b</sup> Department of Chemical Engineering, Energy Institute of Higher Education,  
Saveh, Iran*

*<sup>c</sup> Iranian Society of Philosophers, Department of Science, Tehran, Iran*

*<sup>d</sup> Peykareh Enterprise Development CO., Tehran, Iran*

*\*E-mail: reza\_peymanfar@alumni.iust.ac.ir, ghafuri@iust.ac.ir*

### 1. Characterization

#### 1. 1. H-NMR analysis

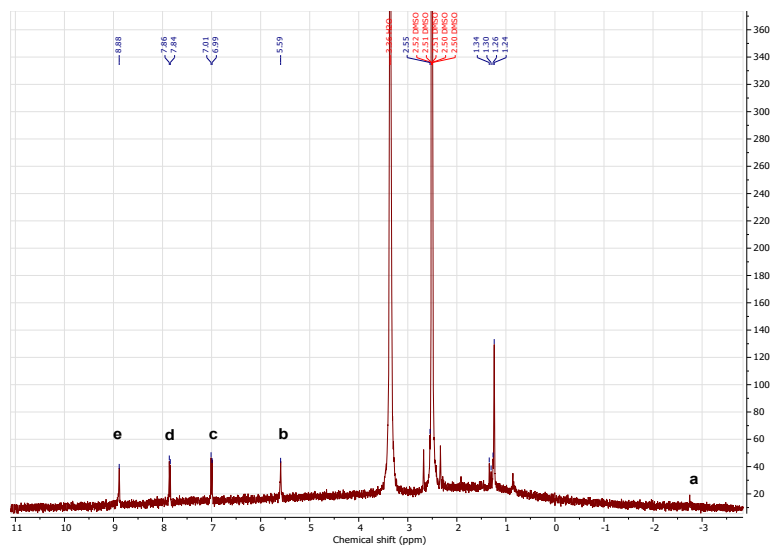

**Fig. S1.** H-NMR spectrum of TAPP sample

## 1. 2. Microwave absorbing features

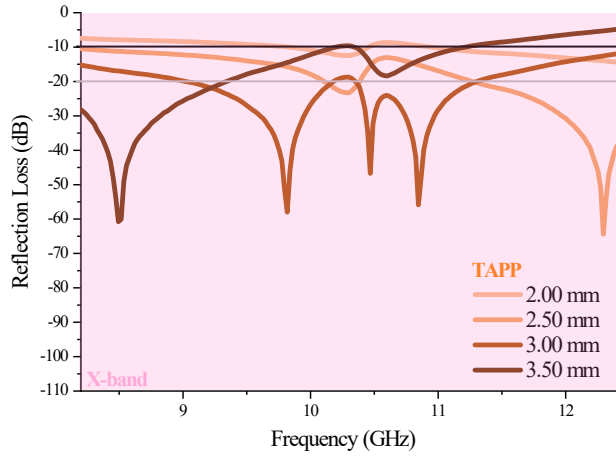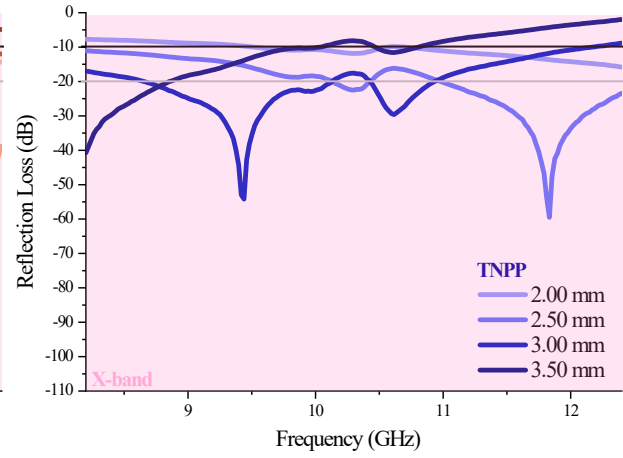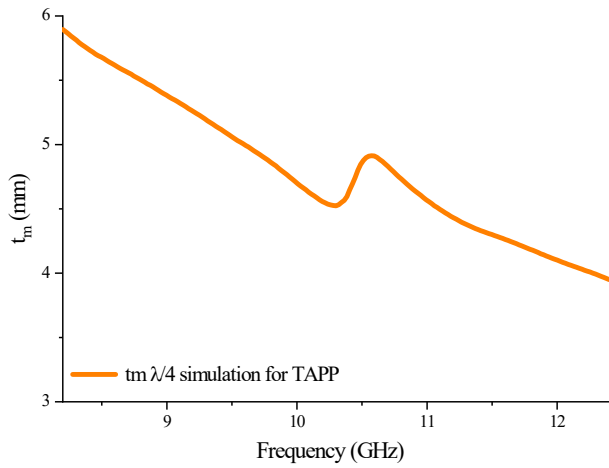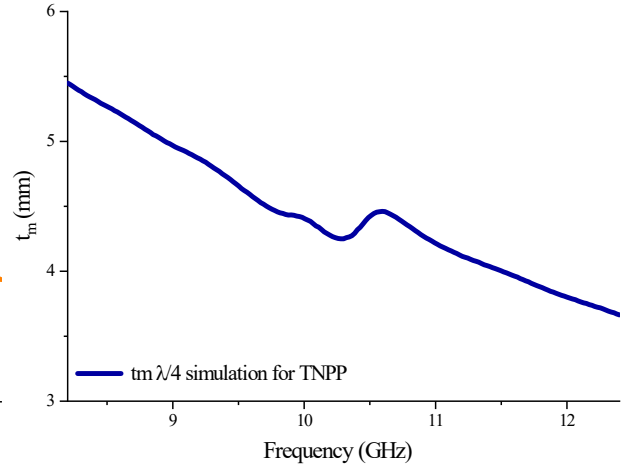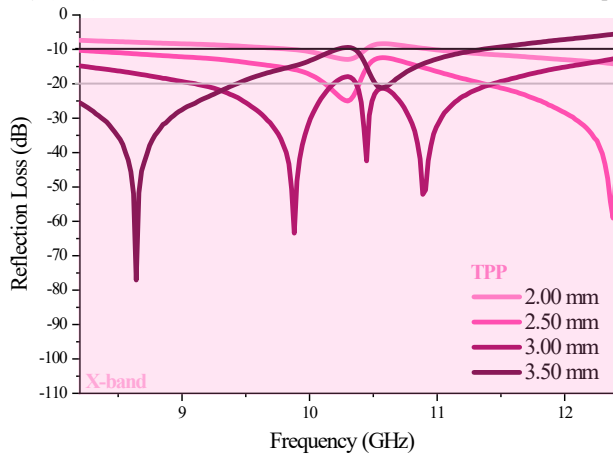

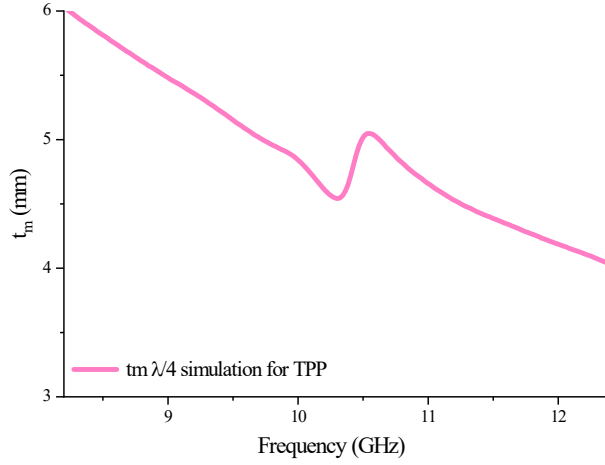

**Fig. S2.** Microwave absorbing performance and simulation of matching thickness for the porphyrin derivatives from 8.2 to 18 GHz

**Table. S1.** The equations applied to evaluate the results

| Entry/title:                   | Equation/s:                                                                                                                                                                                                                                                                                                                |
|--------------------------------|----------------------------------------------------------------------------------------------------------------------------------------------------------------------------------------------------------------------------------------------------------------------------------------------------------------------------|
| 1/Kubelka–Munk theory          | $(\alpha hv)^2 = hv - E_g$ , $\alpha = -1/t \ln T$ , and $T = 10^{-A}$                                                                                                                                                                                                                                                     |
| 2/Transmission line theory     | $R(dB) = 20 \text{Log} \left  \frac{Z_{in} - Z_0}{Z_{in} + Z_0} \right $ , $Z_{in} = \frac{\mu_r}{\sqrt{\epsilon_r}} \tanh \left[ j \sqrt{\mu_r \epsilon_r} f \left( \frac{2\pi}{c} \right) d \right]$ , $Z_0 = \sqrt{\frac{\mu_0}{\epsilon_0}}$ ,<br>$\epsilon_r = \epsilon' - j\epsilon''$ , and $\mu_r = \mu' - j\mu''$ |
| 3/Quarter wavelength mechanism | $t_m = \frac{nc}{4f_m \sqrt{ \epsilon_r   \mu_r }}$                                                                                                                                                                                                                                                                        |

|                           |                                                                                                                                                                                      |
|---------------------------|--------------------------------------------------------------------------------------------------------------------------------------------------------------------------------------|
| 4/Impedance matching      | $Z = \frac{Z_{in}}{Z_0} = \sqrt{\frac{\mu_r}{\epsilon_r}}$                                                                                                                           |
| 5/Attenuation constant    | $\alpha = \sqrt{\sqrt{(\epsilon_r''\mu_r'' - \epsilon_r'\mu_r')^2 + (\epsilon_r'\mu_r'' + \epsilon_r''\mu_r')^2} + (\epsilon_r''\mu_r'' - \epsilon_r'\mu_r')\frac{\sqrt{2f\pi}}{c}}$ |
| 6/Debye relaxation theory | $\left(\epsilon' - \frac{\epsilon_s + \epsilon_\infty}{2}\right)^2 + (\epsilon'')^2 = \left(\frac{\epsilon_s - \epsilon_\infty}{2}\right)^2$                                         |

**Table. S2.** Definitions of the parameters employed to examine the achievements <sup>1-</sup>

10

| Symbol:     | Definition:               | Symbol:  | Definition:        | Symbol:      | Definition:                     |
|-------------|---------------------------|----------|--------------------|--------------|---------------------------------|
| d           | Thickness of absorber     | $Z_{in}$ | Input impedance    | c            | Velocity of light in free space |
| $\alpha$    | Absorption coefficient    | $\nu$    | Frequency          | T            | Transmittance                   |
| $\mu'$      | Real part of permeability | $t_m$    | Matching thickness | $\mu''$      | Imaginary part of permeability  |
| h           | Planck constant           | A        | Absorbance         | t            | Thickness                       |
| $Z_0$       | Free space impedance      | n        | Odd number         | f            | Frequency                       |
| $\epsilon'$ | Real part of              | $f_m$    | Matching           | $\epsilon''$ | Imaginary part of               |

|                     |                                        |              |                       |              |                     |
|---------------------|----------------------------------------|--------------|-----------------------|--------------|---------------------|
|                     | permittivity                           |              | frequency             |              | permittivity        |
| $\epsilon_{\infty}$ | Permittivity at the infinite frequency | $\epsilon_0$ | Permittivity constant | $\epsilon_s$ | Static permittivity |

## References

1. S. Zhang, Q. Cao, M. Zhang and X. Shi, *Journal of Applied Physics*, 2013, **113**, 074903.
2. F. Qin and C. Brosseau, *Journal of applied physics*, 2012, **111**, 4.
3. X.-J. Zhang, G.-S. Wang, W.-Q. Cao, Y.-Z. Wei, J.-F. Liang, L. Guo and M.-S. Cao, *ACS applied materials & interfaces*, 2014, **6**, 7471-7478.
4. D. Moitra, S. Dhole, B. K. Ghosh, M. Chandel, R. K. Jani, M. K. Patra, S. R. Vadera and N. N. Ghosh, *The Journal of Physical Chemistry C*, 2017, **121**, 21290-21304.
5. M. Du, Z. Yao, J. Zhou, P. Liu, T. Yao and R. Yao, *Synthetic Metals*, 2017, **223**, 49-57.
6. R. Shu, W. Li, X. Zhou, D. Tian, G. Zhang, Y. Gan, J. Shi and J. He, *Journal of Alloys and Compounds*, 2018, **743**, 163-174.
7. M. Almasi-Kashi, M. H. Mokarian and S. Alikhanzadeh-Arani, *Journal of Alloys and Compounds*, 2018, **742**, 413-420.
8. P. J. Bora, I. Azeem, K. Vinoy, P. C. Ramamurthy and G. Madras, *Composites Part B: Engineering*, 2018, **132**, 188-196.
9. Y. Wang, X. Wu, W. Zhang, J. Li, C. Luo and Q. Wang, *Synthetic Metals*, 2017, **229**, 82-88.
10. W. B. Weir, *Proceedings of the IEEE*, 1974, **62**, 33-36.
